# Supplementary material
Source: PubMed Central journal article supplement (PMC7415475)
Supplement: NIHMS1555391-supplement-Supplemental_Digital_Content_to_Be_Published__cited_in_text__2.pdf [file NIHMS1555391-supplement-Supplemental_Digital_Content_to_Be_Published__cited_in_text__2.pdf]

## Supplemental Material

1. SDC Methods
2. Table S1
3. Figure S1
4. Figure S2
5. References

### SDC Methods

#### *Geocoding*

To facilitate the use of geolocation, a data element which is private health information, without requiring sharing among study sites, addresses were geocoded using DeGAUSS,<sup>1</sup> an offline, HIPAA-compliant software program. The software utilizes TIGER/Line files<sup>2</sup> put forth by the US Census Bureau to map street addresses to latitudinal and longitudinal coordinates that can be subsequently geospatially joined to counties and census tracts.<sup>3</sup> The program can identify addresses with minor lexical differences from published street names. The output includes a precision assessment. Only addresses that were geocoded to a range of addresses within a street segment ('range') were included in this analysis. Once addresses are linked to specified geographic areas (e.g., census tract), they can be linked to the wealth of area-based measures publically available for analysis. As noted above, participants were excluded from analyses if their addresses could not be obtained, geocoded, or if geocoding precision was not in 'range' precision.<sup>1,4</sup>

**Table S1. Demographic characteristics of excluded participants**

| Characteristic                                                 | Overall<br>N = 400    | Site Excluded<br>N = 76 | Site Included<br>N = 271 | Excluded Insufficient<br>Data<br>N = 53 | p-value |
|----------------------------------------------------------------|-----------------------|-------------------------|--------------------------|-----------------------------------------|---------|
|                                                                | Mean ± SD or<br>N (%) | Mean ± SD or<br>N (%)   | Mean ± SD or<br>N (%)    | Mean ± SD or<br>N (%)                   |         |
| <b>Age at MALT Enrollment (years)</b>                          | 9.64 ± 4.51           | 10.09 ± 4.699           | 9.5 ± 4.499              | 9.72 ± 4.327                            | 0.5975  |
| <b>Age at Transplant (years)</b>                               | 2.88 ± 3.423          | 2.16 ± 2.719            | 3.01 ± 3.554             | 3.23 ± 3.563                            | 0.1134  |
| <b>Gender</b>                                                  |                       |                         |                          |                                         |         |
| Male                                                           | 189 (47.25)           | 30 (39.47)              | 131 (48.34)              | 28 (52.83)                              | 0.2678  |
| Female                                                         | 211 (52.75)           | 46 (60.53)              | 140 (51.66)              | 25 (47.17)                              |         |
| <b>Race</b>                                                    |                       |                         |                          |                                         |         |
| Asian                                                          | 25 (6.25)             | 9 (11.84)               | 13 (4.8)                 | 3 (5.66)                                | 0.0006  |
| Black or African American                                      | 56 (14)               | 20 (26.32)              | 30 (11.07)               | 6 (11.32)                               |         |
| White or Caucasian                                             | 268 (67)              | 34 (44.74)              | 195 (71.96)              | 39 (73.58)                              |         |
| Other                                                          | 51 (12.75)            | 13 (17.11)              | 33 (12.18)               | 5 (9.43)                                |         |
| <b>Primary Insurance</b>                                       |                       |                         |                          |                                         |         |
| Medicaid or equivalent and/or state funded children's services | 156 (39)              | 21 (27.63)              | 114 (42.07)              | 21 (39.62)                              | <.0001  |
| HMO/managed care                                               | 101 (25.25)           | 9 (11.84)               | 77 (28.41)               | 15 (28.3)                               |         |
| Traditional private insurance                                  | 94 (23.5)             | 17 (22.37)              | 65 (23.99)               | 12 (22.64)                              |         |
| Other                                                          | 49 (12.25)            | 29 (38.16)              | 15 (5.54)                | 5 (9.43)                                |         |
| <b>Primary Caregiver's Marital Status</b>                      |                       |                         |                          |                                         |         |
| Single-parent household                                        | 3 (0.75)              | 23 (30.67)              | 45 (16.73)               | 12 (22.64)                              | 0.0258  |
| Two-parent household                                           | 80 (20)               | 52 (69.33)              | 224 (83.27)              | 41 (77.36)                              |         |
| Missing                                                        | 317 (79.25)           |                         |                          |                                         |         |
| <b>Primary Caregiver's Highest Education Level</b>             |                       |                         |                          |                                         |         |
| Some high school or less                                       | 22 (5.5)              | 11 (14.86)              | 28 (10.98)               | 4 (8.16)                                | 0.3503  |
| High school degree/GED                                         | 43 (10.75)            | 26 (35.14)              | 58 (22.75)               | 13 (26.53)                              |         |

| Characteristic                                        | Overall<br>N = 400    | Site Excluded<br>N = 76 | Site Included<br>N = 271 | Excluded Insufficient<br>Data<br>N = 53 | p-value |
|-------------------------------------------------------|-----------------------|-------------------------|--------------------------|-----------------------------------------|---------|
|                                                       | Mean ± SD or<br>N (%) | Mean ± SD or<br>N (%)   | Mean ± SD or<br>N (%)    | Mean ± SD or<br>N (%)                   |         |
| Vocational school or some college                     | 97 (24.25)            | 9 (12.16)               | 56 (21.96)               | 12 (24.49)                              |         |
| College degree                                        | 77 (19.25)            | 21 (28.38)              | 79 (30.98)               | 15 (30.61)                              |         |
| Professional or graduate degree                       | 115 (28.75)           | 7 (9.46)                | 34 (13.33)               | 5 (10.2)                                |         |
| Missing                                               | 46 (11.5)             |                         |                          |                                         |         |
| <b>Primary Diagnosis</b>                              |                       |                         |                          |                                         |         |
| Acute Liver Failure                                   | 44 (11)               | 12 (15.79)              | 28 (10.33)               | 4 (7.55)                                | 0.0311  |
| Biliary Atresia                                       | 193 (48.25)           | 36 (47.37)              | 135 (49.82)              | 22 (41.51)                              |         |
| Other Cholestatic diseases                            | 65 (16.25)            | 7 (9.21)                | 49 (18.08)               | 9 (16.98)                               |         |
| Metabolic Diseases that primarily affect other organs | 37 (9.25)             | 7 (9.21)                | 21 (7.75)                | 9 (16.98)                               |         |
| Liver Malignancies                                    | 31 (7.75)             | 3 (3.95)                | 21 (7.75)                | 7 (13.21)                               |         |
| Other                                                 | 30 (7.5)              | 11 (14.47)              | 17 (6.27)                | 2 (3.77)                                |         |
| <b>Donor Type</b>                                     |                       |                         |                          |                                         |         |
| Deceased                                              | 309 (77.25)           | 51 (67.11)              | 218 (80.44)              | 40 (75.47)                              | 0.0469  |
| Living                                                | 91 (22.75)            | 25 (32.89)              | 53 (19.56)               | 13 (24.53)                              |         |

SD: Standard deviation, MALT: Medication Adherence in children who had a Liver Transplant; HMO: health maintenance organization; GED: General educational development

**Figure S1. Distributions of deprivation index and MLVI for all included participants**

MLVI: Medication Level Variability Index

Legend: a. MLVI across participants. One outlier was included in the reported analyses but not displayed in this figure (MLVI = 23.1). The data appeared to be right skewed. b. The deprivation index across all participants. The data appeared to be normally distributed.

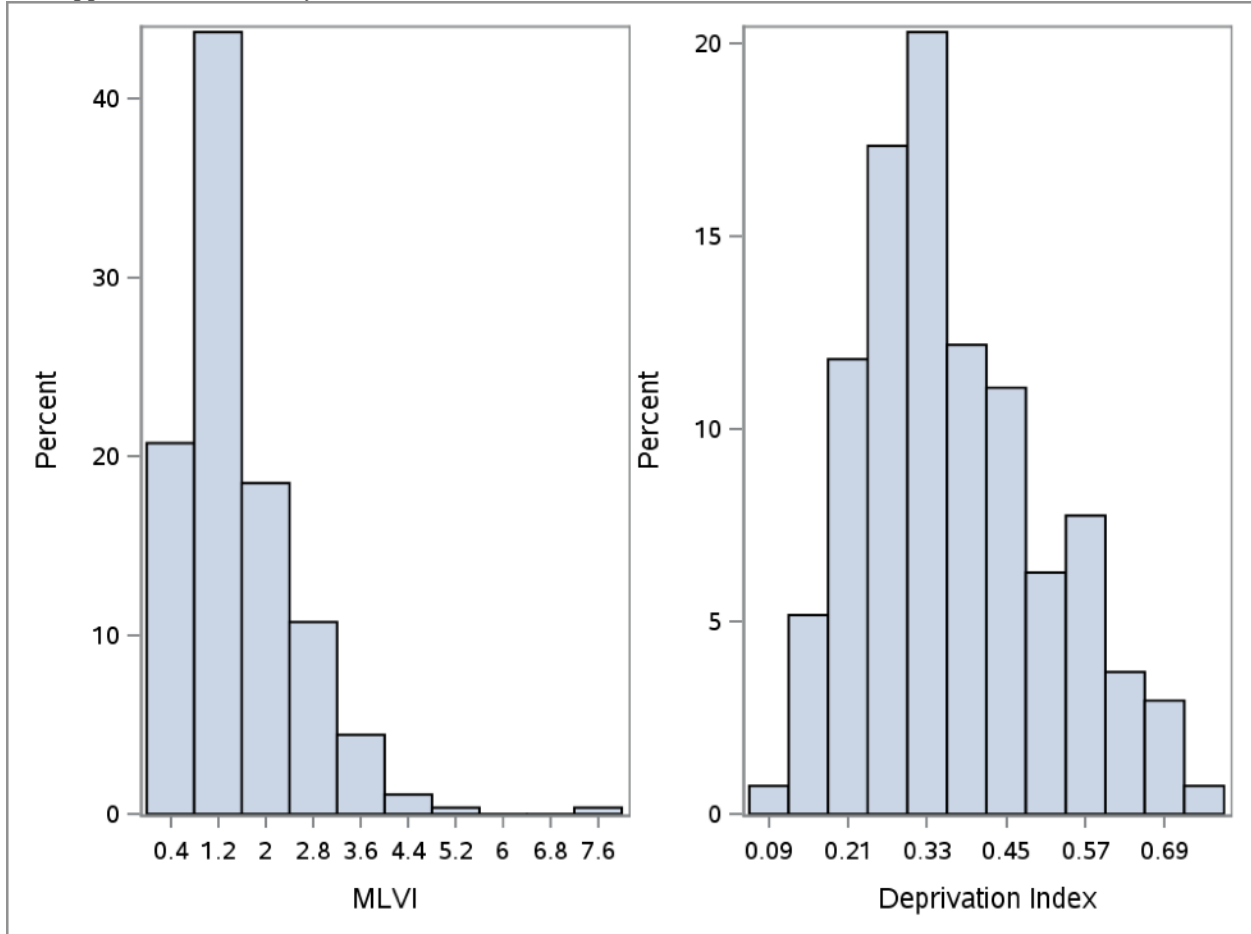

**Figure S2. Scatter plots of total number of barriers to adherence identified on MLVI and deprivation index on total number of identified barriers for parents and adolescent participants.**

PMB: Parent Medication Barriers Scale, AMB: Adolescent Medication Barriers Scale, MLVI: Medication level variability index

Legend: The deprivation index was associated with PMB (top left), however, the PMB was not associated with MLVI (top right). The deprivation index was not associated with AMB (bottom left), however, the AMB scale was associated with MLVI (bottom right).

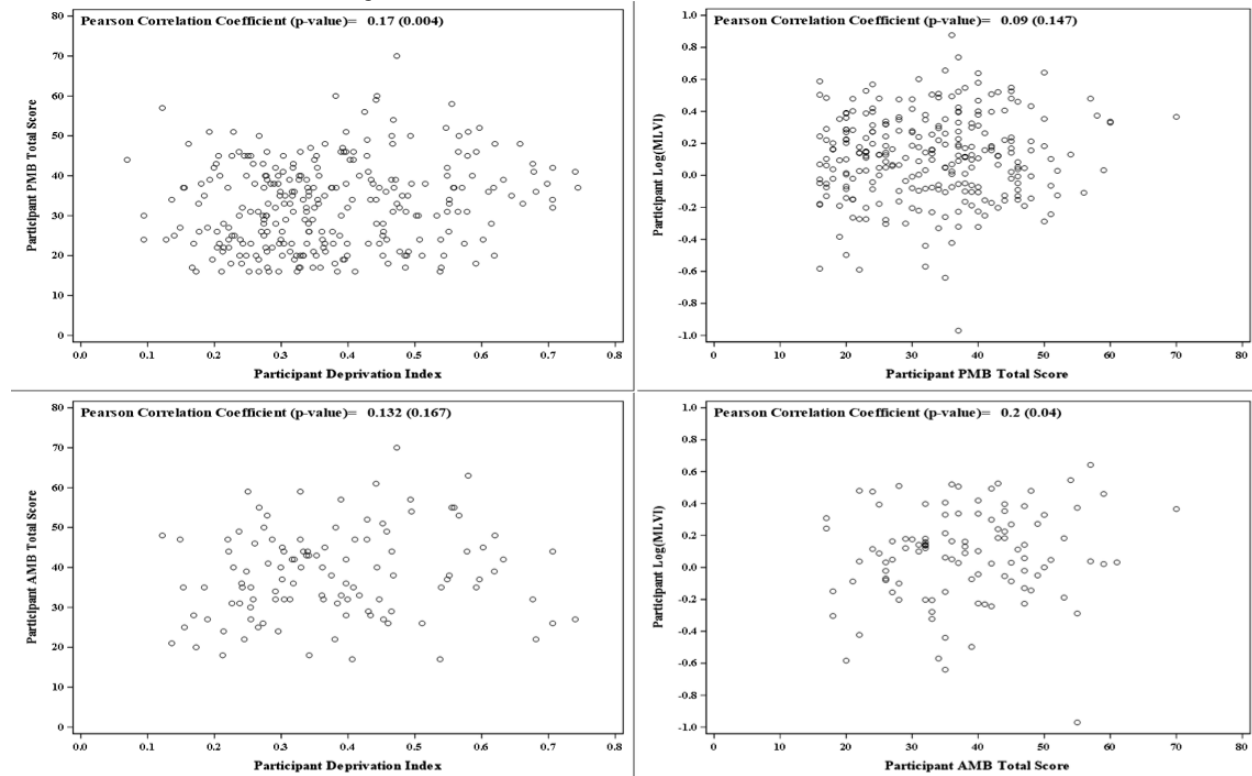

## References

1. Brokamp C, Wolfe C, Lingren T, et al. Decentralized and reproducible geocoding and characterization of community and environmental exposures for multisite studies. *J Am Med Inform Assoc.* 2019;25(3):309–314.
2. Geography UCB. TIGER/Line Shapefiles and TIGER/Line Files. United States Census Bureau website. 2012. Available at <https://www.census.gov/geo/maps-data/data/tiger-line.html>. Accessed September 2019.
3. Rossiter, K. Understanding geographic relationships: counties, places, tracts and more. United States Census Bureau Random Samplings website. 2014. Available at <https://www.census.gov/newsroom/blogs/random-samplings/2014/07/understanding-geographic-relationships-counties-places-tracts-and-more.html>. Accessed January 2020.
4. Brokamp C. Geocoding with DeGAUSS. DeGAUSS website. 2019. Available at <https://github.com/degauss-org/DeGAUSS/wiki/Geocoding-with-DeGAUSS>. Accessed January 2020.
